# Supplementary material for: Comparative Transcriptome Analysis Shows Conserved Metabolic Regulation during Production of Secondary Metabolites in Filamentous Fungi
Source: PubMed Central journal article supplement (PMC6469955; doi:10.1128/msystems.00012-19), 2019-04-16
Supplement: mSystems.00012-19-sf004.pdf [file mSystems.00012-19-sf004.pdf]

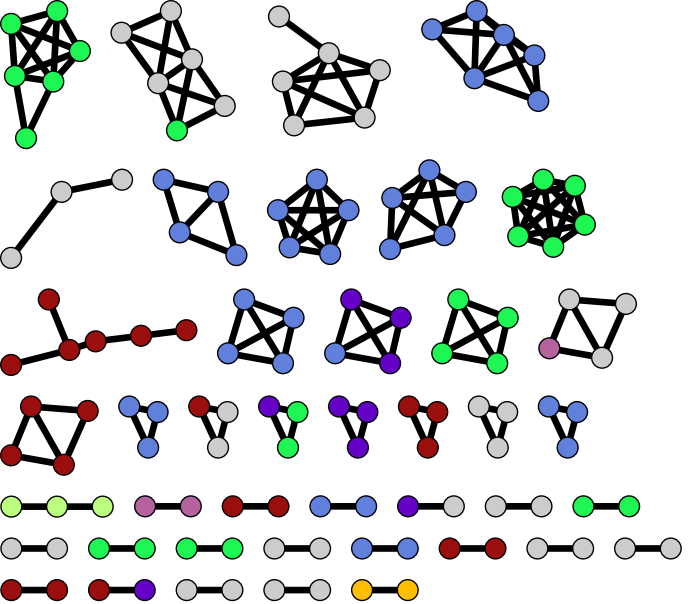

● NRPS BGCs

● t1PKS BGCs

● terpenoid BGCs

● PKS-NRPS BGCs

● t3PKS BGCs

● indole alkaloids

● indole

● other
