# Supplementary material for: Comparative Transcriptome Analysis Shows Conserved Metabolic Regulation during Production of Secondary Metabolites in Filamentous Fungi
Source: PubMed Central journal article supplement (PMC6469955; doi:10.1128/msystems.00012-19), 2019-04-16
Supplement: mSystems.00012-19-sf005.pdf [file mSystems.00012-19-sf005.pdf]

- Detected in DM and CM
- Detected in CM only
- Detected in DM only
- Not detected

|                      |                       |                     |                       |                     |                   |                        |
|----------------------|-----------------------|---------------------|-----------------------|---------------------|-------------------|------------------------|
|                      |                       |                     |                       |                     |                   | Roquefortine/melegrine |
|                      |                       |                     |                       |                     |                   | Andrastin              |
|                      |                       |                     |                       |                     |                   | Fungisporin            |
|                      |                       |                     |                       |                     |                   | Chrysogine             |
|                      |                       |                     |                       |                     |                   | Citreo-isocumarin      |
|                      |                       |                     |                       |                     |                   | Patulin                |
|                      |                       |                     |                       |                     |                   | Griseofulvin           |
|                      |                       |                     |                       |                     |                   | Penicillic acid        |
|                      |                       |                     |                       |                     |                   | Aspterric acid         |
|                      |                       |                     |                       |                     |                   | Verrucofortine         |
|                      |                       |                     |                       |                     |                   | Calbistrin             |
|                      |                       |                     |                       |                     |                   | Trichodermamide        |
| <i>P. flavigenum</i> | <i>P. nalgiovense</i> | <i>P. polonicum</i> | <i>P. coprophilum</i> | <i>P. decumbens</i> | <i>P. steckii</i> |                        |
